# Supplementary material
Source: publisher figshare collection journal article supplement (https://acs.figshare.com/ndownloader/files/5184955)
Supplement: Supplementary file 1 [file 5184955]

## Supporting Information

For

### **Mechanistic Studies on the Formation and Reactivity of Dioxygen Adducts of Diiron Complexes Supported by Sterically Hindered Carboxylates**

Sergey V. Kryatov,<sup>a</sup> Ferman A. Chavez,<sup>b</sup> Anne M. Reynolds,<sup>b</sup> Elena V. Rybak-Akimova,<sup>a,\*</sup>  
Lawrence Que, Jr.,<sup>b,\*</sup> and William B. Tolman<sup>a,\*</sup>

<sup>a</sup> *Department of Chemistry, Tufts University, 62 Talbot Ave, Medford, Massachusetts, 02155, and* <sup>b</sup>  
*Department of Chemistry and Center for Metals in Biocatalysis, University of Minnesota, 207*  
*Pleasant St. SE, Minneapolis, Minnesota, 55455*

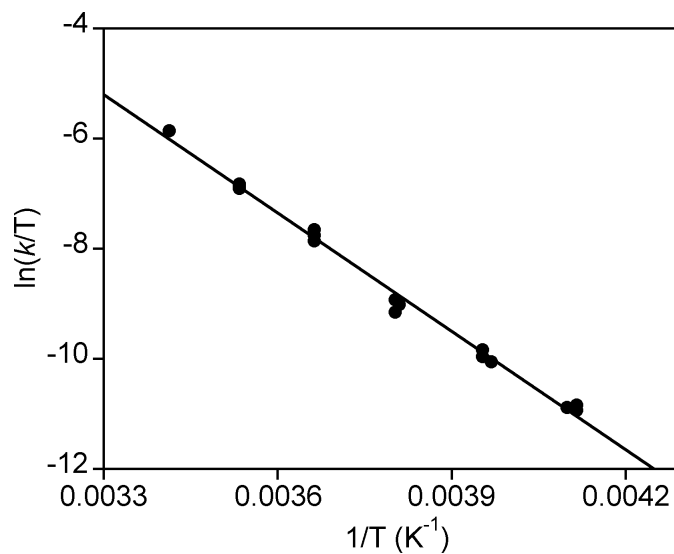

**Figure S1.** Eyring plot for the decomposition of **2-Py** in the absence of added substrate. Derived activation parameters are listed in Table 1.

**Table S1.** Second order rate constants for the oxygenation of diferrous complexes determined at 233 K.

| Complex       | $k, \text{M}^{-1} \text{s}^{-1}$ | $k, \text{M}^{-1} \text{s}^{-1}$ |
|---------------|----------------------------------|----------------------------------|
|               | (pseudo-first order conditions)  | (second order conditions)        |
| <b>1-Py</b>   | $215 \pm 9$                      | $213 \pm 10$                     |
| <b>1-MeIm</b> | $303 \pm 17$                     | $293 \pm 10$                     |
| <b>1-THF</b>  | $322 \pm 14$                     | $322 \pm 16$                     |
